# Supplementary material for: The Dynamics of Platelet Activation during the Progression of Streptococcal Sepsis
Source: PLOS journal article supplement (doi:10.1371/journal.pone.0163531), 2016-09-22
Supplement: S1 (10.1371/journal.pone.0163531.s001) [file journal.pone.0163531.s001]

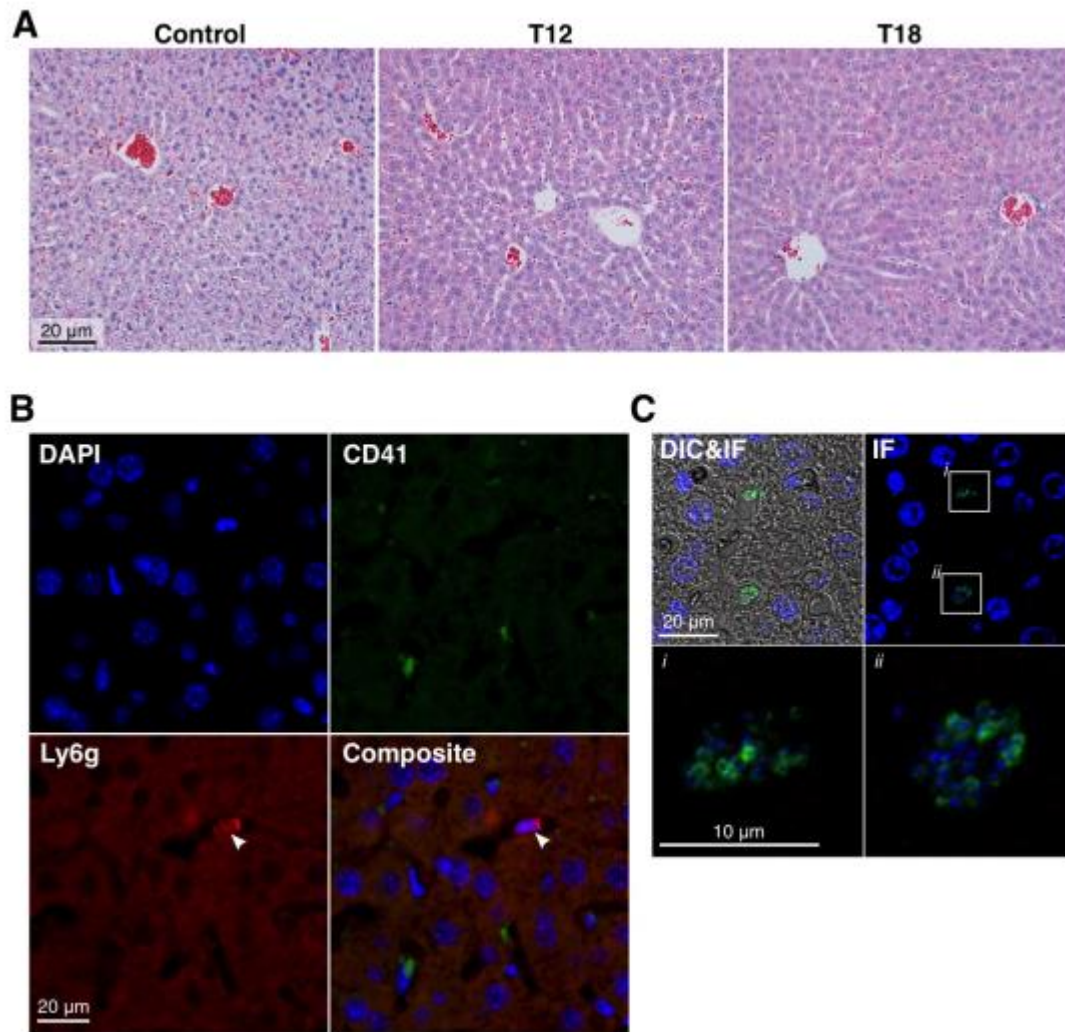

**S1 Fig. Co-localisation of platelets with bacteria but not neutrophils in the liver**

Haematoxylin and eosin stained sections of livers (uninfected control and infected for 12 and 18 h - T12 and T18 (A). Epifluorescence (B) and confocal microscopy (C) of a liver section 18 h post infection. Double immunolabelling of the liver sinusoids demonstrate platelets (green) and neutrophils (red, shown by an arrowhead). The nuclei of the liver cells were counterstained with DAPI (blue) (B). Confocal differential interference contrast (DIC) and

immunofluorescence (IF) images indicate that platelet aggregates (green) co-localized with bacteria stained with DAPI (blue) **(C)**.
